# Supplementary material for: CRISPR/Cas9-induced knockout and knock-in mutations in Chlamydomonas reinhardtii
Source: PubMed Central journal article supplement (PMC4904240; doi:10.1038/srep27810), 2016-06-13
Supplement: srep27810-s1.pdf [file srep27810-s1.pdf]

## **CRISPR/Cas9-induced knockout and knock-in mutations in *Chlamydomonas reinhardtii***

Sung-Eun Shin<sup>a,§</sup>, Jong-Min Lim<sup>b,§</sup>, Hyun Gi Koh<sup>a</sup>, Eun Kyung Kim<sup>h</sup>, Nam Kyu Kang<sup>a</sup>, Seungjib Jeon<sup>a</sup>, Sohee Kwon<sup>a</sup>, Won-Sub Shin<sup>a</sup>, Bongsoo Lee<sup>a</sup>, Kwon Hwangbo<sup>b,c</sup>, Jungeun Kim<sup>d,e</sup>, Sung Hyeok Ye<sup>d,f</sup>, Jae-Young Yun<sup>d</sup>, Hogyun Seo<sup>g</sup>, Hee-Mock Oh<sup>b</sup>, Kyung-Jin Kim<sup>g</sup>, Jin-Soo Kim<sup>d,e</sup>, Won-Joong Jeong<sup>b\*</sup>, Yong Keun Chang<sup>a,h\*</sup>, Byeong-ryool Jeong<sup>a\*</sup>

<sup>a</sup> Department of Chemical and Biomolecular Engineering, Korea Advanced Institute of Science and Technology (KAIST), Daejeon 34141, Republic of Korea

<sup>b</sup> Korea Research Institute of Bioscience and Biotechnology (KRIBB), Daejeon 34141, Republic of Korea

<sup>c</sup> Department of Biological Science, Chungnam National University (CNU), Daejeon 34134, Republic of Korea

<sup>d</sup> Center for Genome Engineering, Institute for Basic Science (IBS), Seoul 08826, Republic of Korea

<sup>e</sup> Department of Chemistry, Seoul National University (SNU), Seoul 08826, Republic of Korea

<sup>f</sup> Basic science, IBS school, Korea University of Science and Technology (UST), Seoul 08826, Republic of Korea

<sup>g</sup> School of Life Sciences, KNU Creative BioResearch Group, Kyungpook National University (KNU), Daegu 41566, Republic of Korea

<sup>h</sup> Advanced Biomass R&D Center (ABC), KAIST, Daejeon 34141, Republic of Korea

§: Both authors contributed equally to this work.

**\*Corresponding authors:**

Byeong-ryool Jeong is to be contacted at Tel.: +82-42-350-3964, Fax: +82-42-350-8858, E-mail: [bjjeong@kaist.ac.kr](mailto:bjjeong@kaist.ac.kr); Yong Keun Chang: +82-42-350-3924, [changyk@kaist.ac.kr](mailto:changyk@kaist.ac.kr); Won-Joong Jeong: +82-42-860-4462, [wonjoong@kribb.re.kr](mailto:wonjoong@kribb.re.kr).

|                                                    | 20         | 40         | 60         |    |
|----------------------------------------------------|------------|------------|------------|----|
| <i>Synechocystis</i> sp. (WP_010874061.1)          | MNITSPISAP | SH         |            | 12 |
| <i>Microcystis aeruginosa</i> (NC_010296)          | MTITPIYAA  | SAGTAT     |            | 15 |
| <i>Thermosynechococcus elongatus</i> (NP_683264.1) | MTVA-PSAA  | SAAA       |            | 14 |
| <i>Gloeobacter violaceus</i> (NP_925704.1)         | MSFTIQTYT  | TAPQFGA    |            | 19 |
| <i>Ostreococcus tauri</i> (NC_014432)              | MGVKKG     | -RPTAAPGRG | AT         | 32 |
| <i>Bathycoccus prasinos</i> (NC_024005)            | MATTSASFLS | ARSSASARG  | KTCTSKSSSS | 20 |
| <i>Chlamydomonas reinhardtii</i> (XM_001703345)    | MNITAPTRLD | SRPVASAR   | SSRITSEQTH | 63 |
| <i>Bacillus mycoloides</i> (AJH19322)              | MNVA       |            |            | 4  |
| <i>Thermus thermophilus</i> (YP_144361)            | MGVYARGAF  | RERSM      |            | 16 |
| <i>Pseudomonas amygdali</i> (KKY50726)             | MTQ--TNFR  | SG         |            | 9  |
| <i>Pseudomonas fluorescens</i> (AJZ93490)          | MTQSGTDLR  | HG         |            | 11 |
| <i>Bradyrhizobium elkanii</i> (WP_016847382)       | MNPNLPSNFR | SG         |            | 12 |
| <i>Medicago truncatula</i> (AES70297)              | MENHNNDTG  | SVQS       |            | 14 |
| <i>Glycine max</i> (XP_003519001)                  | MAAS--IP   | TGNSSRYLP  | IPREPHPHFS | 57 |
| <i>Camptotheca acuminata</i> (AAB97526)            | MAAYTN-PAC | RINTSA--FP | GPYRPNPS   | 51 |
| <i>Vitis vinifera</i> (XP_002281484)               | MAASAKTPIS | RTQTS--    | WPKYSSSP   | 49 |
| <i>Arabidopsis thaliana_lower</i> (M81620)         | MATASTAAT  | RPSVSA--   | SSELTH--LR | 52 |
| <i>Brassica napus</i> (XP_013706880)               | MATSGTAST  | RPSVSA--   | SSRLTH--LR | 49 |
| <i>Arabidopsis thaliana_upper</i> (M23872)         | MAASGTSAT  | RASVSSAPSS | SSQLTH--K  | 54 |
| <i>Oryza sativa</i> (AB003491)                     | MAQASAQI-  | -GSGSAQYQ  | SKQTKNFTLA | 52 |
| <i>Zea mays</i> (XP_008662907)                     | MATIAAAR   | SPTRAAAPG- | -PAAPAQRRA | 54 |
| <i>Sorghum bicolor</i> (AAL73524)                  | MA--AATLR  | SPTRAAAPAG | PAAAPTQQR  | 52 |
| <i>Physcomitrella patens</i> (XP_001752340)        | MAAA--     | -PTQATGCTA | SQGVVRKPSA | 47 |
| Consensus                                          | MAXT-XA-XF | SXS-AS---  |            |    |

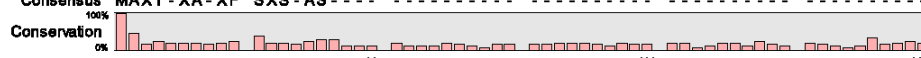

|                                                    | 60         | 100        | 120        |                                       |
|----------------------------------------------------|------------|------------|------------|---------------------------------------|
| <i>Synechocystis</i> sp. (WP_010874061.1)          |            | QYP        | DALGRFGN-Y | GGKYVPETLM                            |
| <i>Microcystis aeruginosa</i> (NC_010296)          |            | QYP        | DAFGRFGR-Y | GGKYVPETLM                            |
| <i>Thermosynechococcus elongatus</i> (NP_683264.1) |            | P          | DARGRFR-Y  | GGKYVPETLM                            |
| <i>Gloeobacter violaceus</i> (NP_925704.1)         |            | P          | DSRGRFR-Y  | GGQYVPETLM                            |
| <i>Ostreococcus tauri</i> (NC_014432)              | SK--EQ     | P          | DAAGRGR-Y  | GGKYVPETLM                            |
| <i>Bathycoccus prasinos</i> (NC_024005)            | MTPPPQQRVF | T          | RDVLRP     | DENGRYGGY                             |
| <i>Chlamydomonas reinhardtii</i> (XM_001703345)    | WAPRWASRKS | TVR        | AAVAAP     | ERPIIDYGRP                            |
| <i>Bacillus mycoloides</i> (AJH19322)              |            |            |            | Y                                     |
| <i>Thermus thermophilus</i> (YP_144361)            |            |            |            | LPDFP                                 |
| <i>Pseudomonas amygdali</i> (KKY50726)             |            |            |            | ANGLRF-SF                             |
| <i>Pseudomonas fluorescens</i> (AJZ93490)          |            |            |            | ANGLRF-AF                             |
| <i>Bradyrhizobium elkanii</i> (WP_016847382)       |            |            |            | DERGHFG-L                             |
| <i>Medicago truncatula</i> (AES70297)              |            |            |            | DSFGRFGR-F                            |
| <i>Glycine max</i> (XP_003519001)                  | TKDPYKSVVP | EEHHSK-MDN | GSVL--QRP  | DSFGRFGR-F                            |
| <i>Camptotheca acuminata</i> (AAB97526)            | AREMEKERS  | EREPDV--   |            | DSFGRFGR-F                            |
| <i>Vitis vinifera</i> (XP_002281484)               |            |            |            | DSFGRFGR-F                            |
| <i>Arabidopsis thaliana_lower</i> (M81620)         | AKDPAAYMA  | DSEKKAAGS  | DPTM--WQRP | DSFGRFGR-F                            |
| <i>Brassica napus</i> (XP_013706880)               | AKDPTFLMA  | EAEKTKAAGS | DPTL--WQRP | DSFGRFGR-F                            |
| <i>Arabidopsis thaliana_upper</i> (M23872)         | AKDPPVLLMA | -----AGS   | DPAL--WQRP | DSFGRFGR-F                            |
| <i>Oryza sativa</i> (AB003491)                     | AKDMHVLMA  | -----AGS   | DPTL--WQGP | DSFGRFGR-F                            |
| <i>Zea mays</i> (XP_008662907)                     | QPAKAAIAEA | ASPAVEMGN  | GAAAPGQRP  | DAMGRFGR-F                            |
| <i>Sorghum bicolor</i> (AAL73524)                  | QPAKAAIAEA | ASPAVEMGN  | GAAVAGMQR  | DAMGRFGR-F                            |
| <i>Physcomitrella patens</i> (XP_001752340)        | ARDAT--A   | KDVTTRDQDD | LRTYKGERP  | DSFGRFGR-F                            |
| Consensus                                          |            |            |            | -QRP DXFGRFGK-F GGKYVPETLM PALXELEXAF |

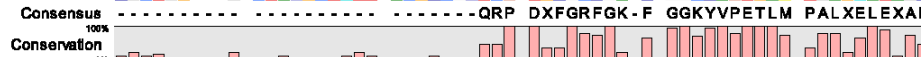

|                                                    | 140        | 160        | 180        |                                 |
|----------------------------------------------------|------------|------------|------------|---------------------------------|
| <i>Synechocystis</i> sp. (WP_010874061.1)          | YRRAEESFQ  | EEAGLKDY   | VGRSSPLYFA | ERLSAHYARF                      |
| <i>Microcystis aeruginosa</i> (NC_010296)          | NQYQDDPDFQ | EEENQLLKDY | VGRPSPLYFA | ERLTAHYAKA                      |
| <i>Thermosynechococcus elongatus</i> (NP_683264.1) | AHYRQDPDFQ | AEQLQLLDY  | VGRPSPLYFA | ERLSAHYAH-                      |
| <i>Gloeobacter violaceus</i> (NP_925704.1)         | NQYRHDPQFL | AEFAGHLRDF | VGRPTPLYFA | ERLTAHWY--                      |
| <i>Ostreococcus tauri</i> (NC_014432)              | EAKTDAAAFI | EEFKSVLKDY | VGRANPLYFA | ERLSEAFKDA                      |
| <i>Bathycoccus prasinos</i> (NC_024005)            | EKLKTDPAFI | EEFKSVLKDY | VGRANPLYFA | ERLSEAFKDA                      |
| <i>Chlamydomonas reinhardtii</i> (XM_001703345)    | NEALADPAFK | AEMEAALKDY | VGRETPLYHA | ERLSAHYKTA                      |
| <i>Bacillus mycoloides</i> (AJH19322)              | KEAMDDPAFK | KELDHYLQTY | VGRETPLYFA | ERNMTKYC--                      |
| <i>Thermus thermophilus</i> (YP_144361)            | REAKKDPAPF | EELDHYLRQF | AGRPTPLYHA | KRLSEYVW--                      |
| <i>Pseudomonas amygdali</i> (KKY50726)             | EAAKADPEFA | KEMAYFORDY | VGRPNPLYFA | ERLTERC---                      |
| <i>Pseudomonas fluorescens</i> (AJZ93490)          | EAAKEDPAFK | KEEAYFORDY | VGRPNPLYFA | ERLTERC---                      |
| <i>Bradyrhizobium elkanii</i> (WP_016847382)       | ADAKADPAFK | AEMNLYLKDY | VGRPSPLYFA | ERLTERH---                      |
| <i>Medicago truncatula</i> (AES70297)              | HSLASDEDFQ | KEEAGVLDKY | VGRESPLYFA | ERLTERHYKRG                     |
| <i>Glycine max</i> (XP_003519001)                  | YSLSADEEFQ | KEEAGVLDKY | VGRESPLYFA | ERLTERHYKRP                     |
| <i>Camptotheca acuminata</i> (AAB97526)            | RSLSGDQVFQ | KEEDGTLKDY | VGRESPLYFA | ERLTERHYKRP                     |
| <i>Vitis vinifera</i> (XP_002281484)               | RALSGDVEFQ | KEEDGTLKDY | VGRESPLYFA | ERLTERHYKRP                     |
| <i>Arabidopsis thaliana_lower</i> (M81620)         | YSLATDDEDQ | RELAELKDY  | VGRESPLYFA | ERLTERHYRR                      |
| <i>Brassica napus</i> (XP_013706880)               | YSLATDDEDQ | RELAELKDY  | VGRESPLYFA | ERLTERHYRR                      |
| <i>Arabidopsis thaliana_upper</i> (M23872)         | YALATDDEDQ | RELAELKDY  | VGRESPLYFA | ERLTERHYRR                      |
| <i>Oryza sativa</i> (AB003491)                     | KKLATDDEDQ | RELAELKDY  | VGRESPLYFA | ESLTERHYRR                      |
| <i>Zea mays</i> (XP_008662907)                     | HALATDDEFQ | KEEDGTLKDY | VGRESPLYFA | ERLTERHYKRA                     |
| <i>Sorghum bicolor</i> (AAL73524)                  | HALATDDEFQ | KEEDGTLKDY | VGRESPLYFA | ERLTERHYKRA                     |
| <i>Physcomitrella patens</i> (XP_001752340)        | RATIKDPEFQ | KEELNDYLDY | VGRETPLYFA | ERLTERHYKRP                     |
| Consensus                                          | YALATDPXFQ | KELAGILKDY | VGRESPLYFA | ERLTERHYKR-DGXGPLYLK REDLNHTGAH |

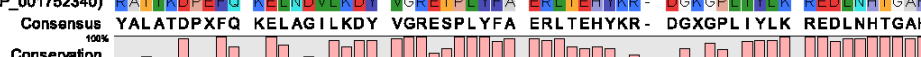

|                                                    | 200                                                                                                                   | 220 | 240 |  |
|----------------------------------------------------|-----------------------------------------------------------------------------------------------------------------------|-----|-----|--|
| <i>Synechocystis</i> sp. (WP_010874081.1)          | K I N N A I G Q V L L A K R M G K K R I A E T G A G Q H G V A T A T V C A R F G L E C I Y M G A Q D M E R Q A L N V   | 164 |     |  |
| <i>Microcystis aeruginosa</i> (NC_010296)          | K I N N A I G Q V L L A K R M G K K R I A E T G A G Q H G V A T A T V C A R F G L E C V Y M G I H D M E R Q E L N V   | 167 |     |  |
| <i>Thermosynechococcus elongatus</i> (NP_683264.1) | K I N N A I G Q V L L A K R M G K Q R I A E T G A G Q H G V A T A T V C A R F G L Q C V Y M G Y Q D M E R Q R L N V   | 163 |     |  |
| <i>Gloeobacter violaceus</i> (NP_925704.1)         | K I N N A I G Q A L L A R M G K R R I A E T G A G Q H G V A T A T V C A R F G L E C I Y M G Y H D I E R Q K L N V     | 164 |     |  |
| <i>Ostreococcus tauri</i> (NC_014432)              | K I N N A I G Q A L L A K R M G K K R I A E T G A G Q H G V A T A T V C A R F G L E C I Y M G A A D M E R Q K L N V   | 187 |     |  |
| <i>Bathycoccus prasinos</i> (NC_024005)            | K I N N A I G Q A I L A K R M G K K R I A E T G A G Q H G V A T A T V C A R F G L E C I Y M G A A D M E R Q K L N V   | 227 |     |  |
| <i>Chlamydomonas reinhardtii</i> (XM_001703345)    | K I N N S I G Q A L L A K R L N K Q R I A E T G A G Q H G V A T A T V C A R Y G L K C I Y M G A K D M E R Q A L N V   | 202 |     |  |
| <i>Bacillus mycoides</i> (AJH19322)                | K I N N T I G Q A L L A V R M G K K K V I A E T G A G Q H G V A T A T V C A L F G L E C V F M G E E D V R R Q A L N V | 150 |     |  |
| <i>Thermus thermophilus</i> (YP_144361)            | K I N N T I G Q A L L A R R M G K R R V I A E T G A G Q H G S V A T A A A F G L E C V Y M G E E D V R R Q A L N V     | 168 |     |  |
| <i>Pseudomonas amygdali</i> (KKY50726)             | K I N N C I G Q V L L A K R M G K K R I A E T G A G M H G V A T A T V A A R F G L P C V Y M G A T D I E R Q Q A N V   | 154 |     |  |
| <i>Pseudomonas fluorescens</i> (AJZ93490)          | K I N N C I G Q I L L A R R M G K K R I A E T G A G M H G V A T A T V A A R F G L Q C V Y M G T F T D I E R Q Q A N V | 156 |     |  |
| <i>Bradyrhizobium elkanii</i> (WP_016847382)       | K V N N V I G Q M V A R R M G K K R I A E T G A G Q H G V A T A T L C A R F G L E C V Y M G A V D E R E Q Q P N V     | 157 |     |  |
| <i>Medicago truncatula</i> (AES70297)              | K I N N A I A Q A L L A K K L G K K R I A E T G A G Q H G V A T A T V C A R F G L E C V Y M G A L D M E R Q A L N V   | 166 |     |  |
| <i>Glycine max</i> (XP_003519001)                  | K I N N A I A Q A L L A K R L G K K R I A E T G A G Q H G V A T A T V C A R F G L E C I Y M G A Q D M E R Q A L N V   | 233 |     |  |
| <i>Camptotheca acuminata</i> (AAB97526)            | K I N N A I A Q A L L A K R L G K K R I A E T G A G Q H G V A T A T V C A R F G L Q C V Y M G A Q D M E R Q A L N V   | 220 |     |  |
| <i>Vitis vinifera</i> (XP_002281484)               | K I N N A I A Q A L L A K R L G K T R I A E T G A G Q H G V A T A T V C A R F G L Q C V Y M G A Q D M E R Q A L N V   | 212 |     |  |
| <i>Arabidopsis thaliana_lower</i> (M81620)         | K I N N A I A Q A L L A K R L G K K R I A E T G A G Q H G V A T A T V C A R F G L Q C I Y M G A Q D M E R Q A L N V   | 229 |     |  |
| <i>Brassica napus</i> (XP_013706880)               | K I N N A I A Q A L L A K R L G K K R I A E T G A G Q H G V A T A T V C A R F G L Q C I Y M G A Q D M E R Q A L N V   | 226 |     |  |
| <i>Arabidopsis thaliana_upper</i> (M23872)         | K I N N A I A Q A L L A K R L G K K R I A E T G A G Q H G V A T A T V C A R F G L Q C I Y M G A Q D M E R Q A L N V   | 224 |     |  |
| <i>Oryza sativa</i> (AB003491)                     | K I N N A I A Q A L S A K R L G K K R I A E T G A G Q H G V A T A T V C A S F G L E C I Y M G A Q D M E R Q A L N V   | 222 |     |  |
| <i>Zea mays</i> (XP_008662907)                     | K I N N A I A Q A L L A K R L G K Q R I A E T G A G Q H G V A T A T V C A R F G L Q C I Y M G A Q D M E R Q A L N V   | 233 |     |  |
| <i>Sorghum bicolor</i> (AAL73524)                  | K I N N A I A Q A L L A K R L G K Q R I A E T G A G Q H G V A T A T V C A R F G L Q C I Y M G A Q D M E R Q A L N V   | 230 |     |  |
| <i>Physcomitrella patens</i> (XP_001752340)        | K I N N A I A Q A L L A K R L G K K R I A E T G A G Q H G V A T A T V C A R F G L E C I Y M G A Q D M E R Q A L N V   | 222 |     |  |

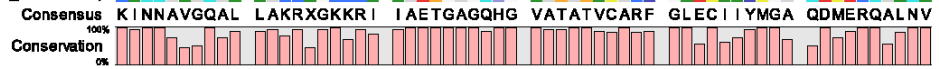

|                                                    | 260                                                                                                                     | 280 | 300 |  |
|----------------------------------------------------|-------------------------------------------------------------------------------------------------------------------------|-----|-----|--|
| <i>Synechocystis</i> sp. (WP_010874081.1)          | F R M N L L G A R V Q P V T A G T G T I K D A T S E A I R D W V T N V E T T H Y I L G S V A G P H P Y P M M V R D F H R | 224 |     |  |
| <i>Microcystis aeruginosa</i> (NC_010296)          | F R M R L L G A T V Q P V A A G T G T I K D A T S E A I R D W V T N V E T T H Y I L G S V A G P H P Y P M M V R D F H A | 227 |     |  |
| <i>Thermosynechococcus elongatus</i> (NP_683264.1) | L R M R L L G A E V A P V S A G T G T I K D A T S E A I R D W V T N V E T T H Y I L G S V A G P H P Y P M L V R E F H A | 223 |     |  |
| <i>Gloeobacter violaceus</i> (NP_925704.1)         | Y R M K L L G A E V R P V A A G T G T I K D A T S E A I R D W V T N V E T T H Y I L G S A A G P H P Y P M V R E F Q A   | 224 |     |  |
| <i>Ostreococcus tauri</i> (NC_014432)              | F R M R L L G A T V R P V A G T A T I K D A T S E A I R D W V T N V E T T H Y I L G S V A G P H P Y P M M V R D F H A   | 247 |     |  |
| <i>Bathycoccus prasinos</i> (NC_024005)            | F R M R L L G A T V I P R V T G T S T I K D A T S Q A I R D W V T N V E T T H Y I L G S V A G P H P Y P M M V R D F H S | 287 |     |  |
| <i>Chlamydomonas reinhardtii</i> (XM_001703345)    | F R M R L L G A E V R P V H S G T A T I K D A T S E A I R D W V T N V E T T H Y I L G S A A G P H P Y P M M V R F Q S   | 262 |     |  |
| <i>Bacillus mycoides</i> (AJH19322)                | F R M E L L G A K V E S V A A G S G T I K D A W N E A I R Y W V S H V D T T H Y I L G S V L G P H P F P G T V R D F Q S | 210 |     |  |
| <i>Thermus thermophilus</i> (YP_144361)            | F R M K L L G A E V R P V A A G S R T I K D A T N E A I R D W I T N V R T T E Y I L G S V L G P H P Y P M M V R D F Q S | 228 |     |  |
| <i>Pseudomonas amygdali</i> (KKY50726)             | F R M K L L G A E I V P V T S G T G T I K D A M N E A I R D W V T N V D S T F Y I L G T V A G P H P Y P A M V R D F Q A | 214 |     |  |
| <i>Pseudomonas fluorescens</i> (AJZ93490)          | F R M K L L G A E V R P V A G T G T I K D A M N E A I R D W V T N V D S T F Y I G T V A G P H P Y P A M V R D F Q A     | 216 |     |  |
| <i>Bradyrhizobium elkanii</i> (WP_016847382)       | F R M E M L G A K V V P V S G A R T I K D A M N D A I R D W V T N V H D T E Y C I G T V A G P H P Y P M M V R D F Q S   | 217 |     |  |
| <i>Medicago truncatula</i> (AES70297)              | F R M R L L G A E V R P V H A G T A T I K D A T S E A I R D W V T N V E T T H Y I L G S V A G P H P Y P M M V R D F H A | 226 |     |  |
| <i>Glycine max</i> (XP_003519001)                  | F R M R L L G A E V R P V H S G T A T I K D A T S E A I R D W V T N V E T T H Y I L G S V A G P H P Y P M M V R D F H A | 293 |     |  |
| <i>Camptotheca acuminata</i> (AAB97526)            | F R M R L L G A E V R A V H S G T A T I K D A T S E A I R D W V T N V E T T H Y I L G S V A G P H P Y P M M V R E F H A | 280 |     |  |
| <i>Vitis vinifera</i> (XP_002281484)               | F R M R L L G A E V R A V H A G T A T I K D A T S E A I R D W V T N V E T T H Y I L G S V A G P H P Y P M M V R D F H A | 272 |     |  |
| <i>Arabidopsis thaliana_lower</i> (M81620)         | F R M R L L G A E V R G V H S G T A T I K D A T S E A I R D W V T N V E T T H Y I L G S V A G P H P Y P M M V R D F H A | 289 |     |  |
| <i>Brassica napus</i> (XP_013706880)               | F R M R L L G A E V R G V H S G T A T I K D A T S E A I R D W V T N V E T T H Y I L G S V A G P H P Y P M M V R D F H A | 286 |     |  |
| <i>Arabidopsis thaliana_upper</i> (M23872)         | F R M R L L G A E V R G V H S G T A T I K D A T S E A I R D W V T N V E T T H Y I L G S V A G P H P Y P M M V R D F H A | 284 |     |  |
| <i>Oryza sativa</i> (AB003491)                     | F R M K L L G A E V R E V H S G T A T I K D A T S E A I R D W V T N V E T T H Y I L G S V A G P H P Y P M M V R E F H K | 282 |     |  |
| <i>Zea mays</i> (XP_008662907)                     | F R M R L L G A E V R A V H S G T A T I K D A T S E A I R D W V T N V E T T H Y I L G S V A G P H P Y P M M V R E F H K | 293 |     |  |
| <i>Sorghum bicolor</i> (AAL73524)                  | F R M R L L G A E V R A V H S G T A T I K D A T S E A I R D W V T N V E T T H Y I L G S V A G P H P Y P M M V R E F H K | 290 |     |  |
| <i>Physcomitrella patens</i> (XP_001752340)        | F R M R L L G A E V R P V H S G T A T I K D A T S E A I R D W V T N V E T T H Y I L G S V A G P H P Y P M V R D F H A   | 282 |     |  |

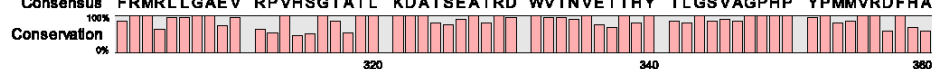

|                                                    | 320                                                                                                                     | 340 | 360 |  |
|----------------------------------------------------|-------------------------------------------------------------------------------------------------------------------------|-----|-----|--|
| <i>Synechocystis</i> sp. (WP_010874081.1)          | V I G K E T R K Q A L E K W G G K P D V L V A C V G G G S N A M G L F H E F - - V D D E V R L I G V E A A G F G L D T   | 282 |     |  |
| <i>Microcystis aeruginosa</i> (NC_010296)          | V I G E E T R Q Q S L E K W G G L P D I L A C V G G G S N A M G L F H E F - - V K E A S V R L I G V E A A G E S I L A S | 285 |     |  |
| <i>Thermosynechococcus elongatus</i> (NP_683264.1) | V I G A E T R Q Q C L E K W G G L P D V L A C V G G G S N A M G L F H E F - - V E E P Q V R L I G V E A A G G G L O T   | 281 |     |  |
| <i>Gloeobacter violaceus</i> (NP_925704.1)         | V I G R E T R Y Q C L E R L G R L P D V L A C V G G G S N A M G L F H D F - - L D E R A V R L V G V E A A G G E T       | 282 |     |  |
| <i>Ostreococcus tauri</i> (NC_014432)              | C I G Q E T R A Q A M E K W G G L P D I L A C V G G G S N A M G L F H E F - - I N D E S V R L I G V E A G G E L A P     | 305 |     |  |
| <i>Bathycoccus prasinos</i> (NC_024005)            | M I G K E V R E Q A M E K W G G K P D I L A C V G G G S N A M G L F H E F - - V N D E S V R L I G V E A G G E G L I     | 345 |     |  |
| <i>Chlamydomonas reinhardtii</i> (XM_001703345)    | V I G R E T R K V Q A Q E K W G G L P D I V A C V G G G S N A M G L F N E F - - I N D T S V R L I G V E A G G E G M N T | 320 |     |  |
| <i>Bacillus mycoides</i> (AJH19322)                | V I G K E T K K Q Y E A L E G K L P E A V A C I G G G S N A M G M F Y P F - - V H D E E V A L Y G V E A A G K G V H T   | 268 |     |  |
| <i>Thermus thermophilus</i> (YP_144361)            | V I G E E V K R Q S L E K L F R L P D A I A A V G G G S N A M G L F A P F A Y L P E G R P K L I G V E A A G E G L S T   | 288 |     |  |
| <i>Pseudomonas amygdali</i> (KKY50726)             | V I G K E T K E Q M Q E K E G R L P D S I A C V G G G S N A M G L F H P F - - L D D A S V E I I G V E A G G H V O T     | 272 |     |  |
| <i>Pseudomonas fluorescens</i> (AJZ93490)          | V I G K E T R D Q L Q A Q E G R L P D S I A C I G G G S N A M G L F H P F - - L D D Q S V E I I G V E A A G H G E T     | 274 |     |  |
| <i>Bradyrhizobium elkanii</i> (WP_016847382)       | V I G H E T R K Q M Q E A E C R L P D S I A C I G G G S N A M G L F H P F - - L D D P L E I F G V E A A G H G - T       | 274 |     |  |
| <i>Medicago truncatula</i> (AES70297)              | V I G K E T R K Q A L E K W G G K P D I L A C V G G G S N A M G L F H E F - - V D D K D V R L I G V E A S G G E S       | 284 |     |  |
| <i>Glycine max</i> (XP_003519001)                  | V I G K E T R K Q A L E K W G G K P D I L A C V G G G S N A M G L F N E F - - V D D K D V R L I G V E A A G F G L D S   | 351 |     |  |
| <i>Camptotheca acuminata</i> (AAB97526)            | V I G K E T R K Q A L E K W G G K P D V L A C V G G G S N A M G L F H E F - - V D D K D V R M I G V E A A G F G L D S   | 338 |     |  |
| <i>Vitis vinifera</i> (XP_002281484)               | V I G K E T R K Q A M E K W G G K P D V L A C V G G G S N A M G L F H E F - - V D D E D V R L I G V E A A G F G L D S   | 330 |     |  |
| <i>Arabidopsis thaliana_lower</i> (M81620)         | V I G K E T R K Q A M E K W G G K P D V L A C V G G G S N A M G L F H E F - - V D D T E V R M I G V E A A G F G L D S   | 347 |     |  |
| <i>Brassica napus</i> (XP_013706880)               | V I G K E T R R Q A M E K W G G K P D V L A C V G G G S N A M G L F H E F - - V D D T E V R M I G V E A A G F G L D S   | 344 |     |  |
| <i>Arabidopsis thaliana_upper</i> (M23872)         | V I G K E T R K Q A L E K W G G K P D V L A C V G G G S N A M G L F H E F - - V D D T E V R M I G V E A A G F G L D S   | 342 |     |  |
| <i>Oryza sativa</i> (AB003491)                     | V I G K E T R R Q A L E K W G G K P D V L A C V G G G S N A M G L F H E F - - V D D Q E V R M I G V E A A G F G L D S   | 340 |     |  |
| <i>Zea mays</i> (XP_008662907)                     | V I G K E T R R Q A M D K W G G K P D V L A C V G G G S N A M G L F H E F - - V E D Q D V R L I G V E A A G H G V O T   | 351 |     |  |
| <i>Sorghum bicolor</i> (AAL73524)                  | V I G K E T R R Q A M D K W G G K P D V L A C V G G G S N A M G L F H E F - - V E D Q D V R L I G V E A A G H G V O T   | 348 |     |  |
| <i>Physcomitrella patens</i> (XP_001752340)        | M I G T E V R R Q A M E K W G G K P D V L A C V G G G S N A M G L F H E F - - E D E D V R L I G V E A A G F G L D T     | 340 |     |  |

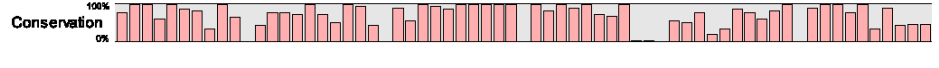

|                                             | 380         | 400         | 420         |            |            |             |     |
|---------------------------------------------|-------------|-------------|-------------|------------|------------|-------------|-----|
| Synechocystis sp. (WP_010874081.1)          | G-KHAAATLTM | GKPGVLHG--  | AMSYLLQDDKE | GOVTEAHSIS | AGLDYPGVGP | EHSYFLKDIGR | 339 |
| Microcystis aeruginosa (NC_010296)          | G-KHAAATLTC | GQPGVLHG--  | AMSYLLQDSE  | GOVTEAHSIS | AGLDYPGVGP | EHSYFLKDSGR | 342 |
| Thermosynechococcus elongatus (NP_683264.1) | G-HHAAATLTK | GEGVVLHG--  | AMSYLLQDAD  | GOVTEAHSIS | AGLDYPGVGP | EHSYFLKDIGR | 338 |
| Gloeobacter violaceus (NP_925704.1)         | G-KHAAATLTA | GKPGVLHG--  | AMSYVLODFQ  | GOVTEAHSIS | AGLDYPGVGP | EHSYFLKDIGR | 339 |
| Ostreococcus tauri (NC_014432)              | GQKHAAATLIT | GTPGVVLHG-- | SFSYLIQDEE  | GOVTEPHSIS | AGLDYPGVGP | EHAFLKDFGR  | 363 |
| Bathycoccus prasinos (NC_024005)            | GQKHAAATLIT | GKPGVLHG--  | SFSYLIQDEE  | GOVTEPHSIS | AGLDYPGVGP | EHSFLKDFGR  | 403 |
| Chlamydomonas reinhardtii (XM_001703345)    | T-KHAAATLTM | GTPGVVLHG-- | SYSYLLQDDD  | GOVTEPHSIS | AGLDYPGVGP | EHSFLKDVKR  | 377 |
| Bacillus mycoides (AJH19322)                | -KHAATLTK   | GSGVVLHG--  | SMYLLQND    | GOVTEAHSIS | AGLDYPGVGP | EHSYFLKDIGR | 325 |
| Thermus thermophilus (YP_144361)            | G-RHAASLIGA | GKRGVLHG--  | SYMVLLYDHD  | GOVTEPHSIS | AGLDYPGVGP | EHSYFLADAGV | 345 |
| Pseudomonas amygdali (KKY50726)             | E-KHAASLNG  | GVPGVVLHGNR | --TYLLQDDG  | GOVTEAHSIS | AGLDYPGVGP | EHAFLHEVYKR | 329 |
| Pseudomonas fluorescens (AJZ93490)          | G-KHAASLNG  | GVPGVVLHGNR | --TYLLQDDG  | GOVTEAHSIS | AGLDYPGVGP | EHAFLHEVYKR | 331 |
| Bradyrhizobium elkanii (WP_016847382)       | G-LHAASLAG  | GRPGVLHGNR  | --TYLLQDDG  | GOVTEAHSIS | AGLDYPGVGP | EHAFLHEVYKR | 331 |
| Medicago truncatula (AES70297)              | G-KHAAATLTK | GEGVVLHG--  | AMSYLLQDDD  | GOVTEPHSIS | AGLDYPGVGP | EHSFLKDIGR  | 341 |
| Glycine max (XP_003519001)                  | G-KHAAATLTK | GEGVVLHG--  | AMSYLLQDDD  | GOVTEPHSIS | AGLDYPGVGP | EHSFLKDIGR  | 408 |
| Camptotheca acuminata (AAB97526)            | G-KHAAATLTK | GEGVVLHG--  | AMSYLLQDDD  | GOVTEPHSIS | AGLDYPGVGP | EHSFLKDIGR  | 395 |
| Vitis vinifera (XP_002281484)               | G-KHAAATLTK | GEGVVLHG--  | AMSYLLQDDD  | GOVTEPHSIS | AGLDYPGVGP | EHSFLKDIGR  | 387 |
| Arabidopsis thaliana_lower (M81620)         | G-KHAAATLTK | GEGVVLHG--  | AMSYLLQDDD  | GOVTEPHSIS | AGLDYPGVGP | EHSFLKDIGR  | 404 |
| Brassica napus (XP_013706880)               | G-KHAAATLTK | GEGVVLHG--  | AMSYLLQDDD  | GOVTEPHSIS | AGLDYPGVGP | EHSFLKDMGR  | 401 |
| Arabidopsis thaliana_upper (M23872)         | G-KHAAATLTK | GEGVVLHG--  | AMSYLLQDDD  | GOVTEPHSIS | AGLDYPGVGP | EHSFLKDMGR  | 399 |
| Oryza sativa (AB003491)                     | G-KHAAATLTK | GEGVVLHGS   | AMSYLLQDDD  | GOVTEPHSIS | AGLDYPGVGP | EHSFLKDMGR  | 399 |
| Zea mays (XP_008662907)                     | E-KHAAATLTK | GQVGVVLHG-- | SMSYLLQDDD  | GOVTEPHSIS | AGLDYPGVGP | EHSFLKDIGR  | 408 |
| Sorghum bicolor (AAL73524)                  | E-KHAAATLTK | GEGVVLHG--  | SMSYLLQDDD  | GOVTEPHSIS | AGLDYPGVGP | EHSFLKDIGR  | 405 |
| Physcomitrella patens (XP_001752340)        | S-KHAAATLTM | GEGVVLHG--  | AMSYLLQDDG  | GOVTEPHSIS | AGLDYPGVGP | EHSFLKDIGR  | 397 |

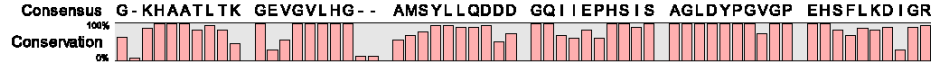

|                                             | 440        | 460         | 480        | 480        |            |             |     |
|---------------------------------------------|------------|-------------|------------|------------|------------|-------------|-----|
| Synechocystis sp. (WP_010874081.1)          | AEYYSVTDEE | AITALQRLSQ  | LEGIPALET  | AHAFAYLET  | CPQLKNGERL | VINCNSGRGDK | 399 |
| Microcystis aeruginosa (NC_010296)          | AEYYSVTDEE | ALEAFQRVSR  | LEGIPALET  | AHALAYLET  | CPQVITGSPR | VINCNSGRGDK | 402 |
| Thermosynechococcus elongatus (NP_683264.1) | AEYYSVTDEE | AVAACVRLAQ  | LEGIPALET  | AHALAYLET  | CPQLTGSPPR | VINCNSGRGDK | 398 |
| Gloeobacter violaceus (NP_925704.1)         | AEYYSVTDEE | ALAAALSLVCS | TEGLIPALET | AHALAYLET  | ASQLHSQELV | VINCNSGRGDK | 399 |
| Ostreococcus tauri (NC_014432)              | EYHAIIDKE  | ADAFVNTSR   | EGIPALET   | SHALAYLEK  | CPGLPNTKV  | VINCNSGRGDK | 423 |
| Bathycoccus prasinos (NC_024005)            | AEYYPATDQE | ALDAFVFTSR  | LEGIPALET  | SHALAYLEK  | CPTLPDKCKV | VINCNSGRGDK | 463 |
| Chlamydomonas reinhardtii (XM_001703345)    | AEYYSATDDE | ALEGFQLLSK  | LEGIPALET  | SHALAYLEK  | TPTLPSGTRV | VINCNSGRGDK | 437 |
| Bacillus mycoides (AJH19322)                | SYHSITDEE  | ALEAFQLLAK  | KEGIPALEE  | SHAVAYALK  | APQMKKDEGL | VINCNSGRGDK | 385 |
| Thermus thermophilus (YP_144361)            | AEYASVTDEE | ALEGFKLLAR  | EGIPALEE   | AHAAIAAAKV | WPEMDKDDVV | VINCNSGRGDK | 405 |
| Pseudomonas amygdali (KKY50726)             | AEYYSITDDE | ALDAFHQCC   | EGIPALET   | AHALAEAMKR | ATNLRDDHLM | VINCNSGRGDK | 389 |
| Pseudomonas fluorescens (AJZ93490)          | QYYSITDDE  | ALDAFHQCC   | EGIPALEE   | AHALAEVFKR | APTLPKDHLM | VINCNSGRGDK | 391 |
| Bradyrhizobium elkanii (WP_016847382)       | WYYSATDEE  | ALAAAFQLLSR | LEGIPALEE  | AHALAYLEK  | APQRPKDHLM | VINCNSGRGDK | 391 |
| Medicago truncatula (AES70297)              | AEYYSVTDEE | ALEAFKRVSR  | LEGIPALEE  | SHALAYLEK  | CPTLPNGTKV | VINCNSGRGDK | 401 |
| Glycine max (XP_003519001)                  | AEYYSVTDEE | ALEAFKRVSR  | LEGIPALEE  | SHALAYLEK  | CPTLPNGTKV | VINCNSGRGDK | 468 |
| Camptotheca acuminata (AAB97526)            | AEYYSCTDEE | ALEAFKRVSR  | LEGIPALEE  | SHALAYLEK  | CPTLPNGTKV | VINCNSGRGDK | 455 |
| Vitis vinifera (XP_002281484)               | AEYYSVTDEE | ALEAFKRVSR  | LEGIPALEE  | SHALAYLEK  | CPTLPNGTKV | VINCNSGRGDK | 447 |
| Arabidopsis thaliana_lower (M81620)         | AEYYSVTDEE | ALEAFKRVSR  | LEGIPALEE  | SHALAYLEK  | CPTLPNGTKV | VINCNSGRGDK | 464 |
| Brassica napus (XP_013706880)               | AEYYSVTDEE | ALEAFKRVSR  | LEGIPALEE  | SHALAYLEK  | CPTLPNGTKV | VINCNSGRGDK | 461 |
| Arabidopsis thaliana_upper (M23872)         | AEYYSVTDEE | ALEAFKRVSR  | LEGIPALEE  | SHALAYLEK  | CPTLPNGTKV | VINCNSGRGDK | 459 |
| Oryza sativa (AB003491)                     | AEYYSVTDEE | ALEAFKRVSR  | LEGIPALEE  | SHALAYLEK  | CPTLPNGTKV | VINCNSGRGDK | 459 |
| Zea mays (XP_008662907)                     | AEYDSITDQE | ALDAFKRVSR  | EGIPALEE   | SHALAYLEK  | CPTLPNGTKV | VINCNSGRGDK | 468 |
| Sorghum bicolor (AAL73524)                  | AEYYSVTDEE | ALEAFKRVSR  | LEGIPALEE  | SHALAYLEK  | CPTLPNGTKV | VINCNSGRGDK | 465 |
| Physcomitrella patens (XP_001752340)        | AEYYSVTDEE | ALEAFQRVSR  | LEGIPALEE  | SHALAYLET  | CPTLPNGTKV | VINCNSGRGDK | 457 |

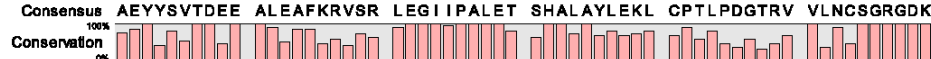

|                                             | 500         | 520        | 540        | 560        |            |            |     |
|---------------------------------------------|-------------|------------|------------|------------|------------|------------|-----|
| Synechocystis sp. (WP_010874081.1)          | -----       | -----      | -----      | -----      | 399        |            |     |
| Microcystis aeruginosa (NC_010296)          | -----       | -----      | -----      | -----      | 402        |            |     |
| Thermosynechococcus elongatus (NP_683264.1) | -----       | -----      | -----      | -----      | 398        |            |     |
| Gloeobacter violaceus (NP_925704.1)         | -----       | -----      | -----      | -----      | 399        |            |     |
| Ostreococcus tauri (NC_014432)              | XXXXXXXXTTS | MYGKMSVELL | LEMPLDVCLY | APVGDGSAAS | ADDTAKAVVA | SWERRNRWEP | 483 |
| Bathycoccus prasinos (NC_024005)            | -----       | -----      | -----      | -----      | 463        |            |     |
| Chlamydomonas reinhardtii (XM_001703345)    | -----       | -----      | -----      | -----      | 437        |            |     |
| Bacillus mycoides (AJH19322)                | -----       | -----      | -----      | -----      | 385        |            |     |
| Thermus thermophilus (YP_144361)            | -----       | -----      | -----      | -----      | 405        |            |     |
| Pseudomonas amygdali (KKY50726)             | -----       | -----      | -----      | -----      | 389        |            |     |
| Pseudomonas fluorescens (AJZ93490)          | -----       | -----      | -----      | -----      | 391        |            |     |
| Bradyrhizobium elkanii (WP_016847382)       | -----       | -----      | -----      | -----      | 391        |            |     |
| Medicago truncatula (AES70297)              | -----       | -----      | -----      | -----      | 401        |            |     |
| Glycine max (XP_003519001)                  | -----       | -----      | -----      | -----      | 468        |            |     |
| Camptotheca acuminata (AAB97526)            | -----       | -----      | -----      | -----      | 455        |            |     |
| Vitis vinifera (XP_002281484)               | -----       | -----      | -----      | -----      | 447        |            |     |
| Arabidopsis thaliana_lower (M81620)         | -----       | -----      | -----      | -----      | 464        |            |     |
| Brassica napus (XP_013706880)               | -----       | -----      | -----      | -----      | 461        |            |     |
| Arabidopsis thaliana_upper (M23872)         | -----       | -----      | -----      | -----      | 459        |            |     |
| Oryza sativa (AB003491)                     | -----       | -----      | -----      | -----      | 459        |            |     |
| Zea mays (XP_008662907)                     | -----       | -----      | -----      | -----      | 468        |            |     |
| Sorghum bicolor (AAL73524)                  | -----       | -----      | -----      | -----      | 465        |            |     |
| Physcomitrella patens (XP_001752340)        | -----       | -----      | -----      | -----      | 457        |            |     |

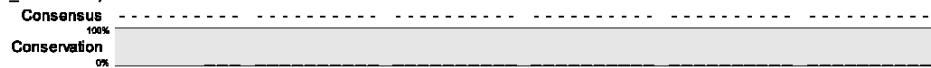

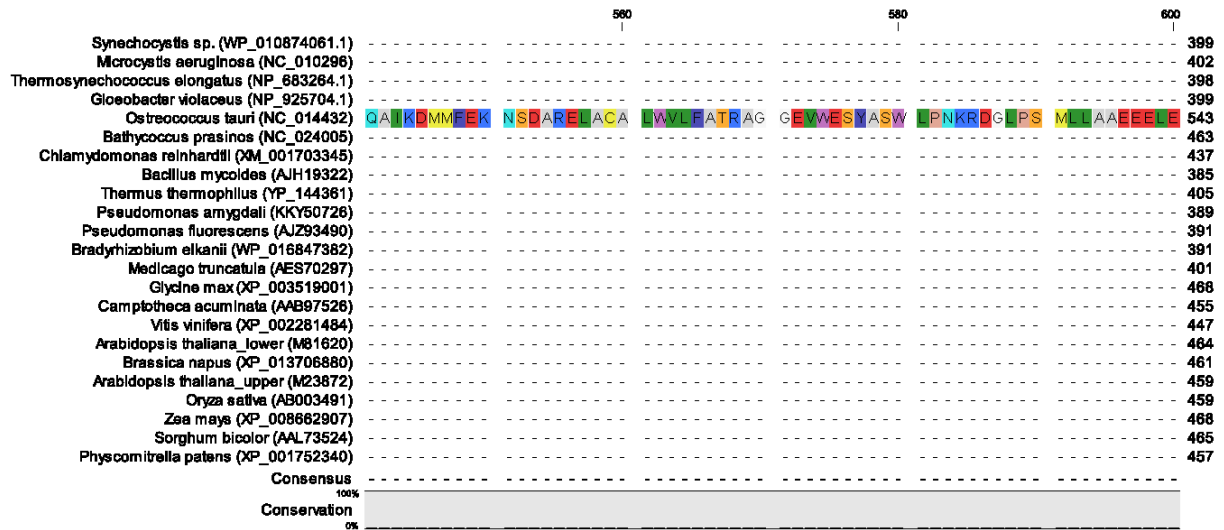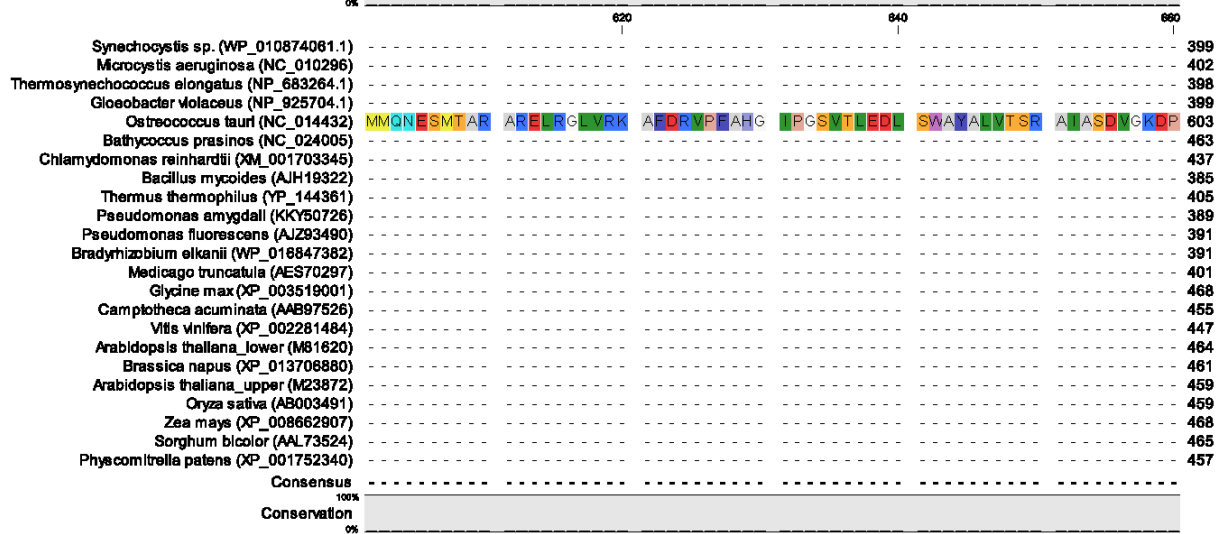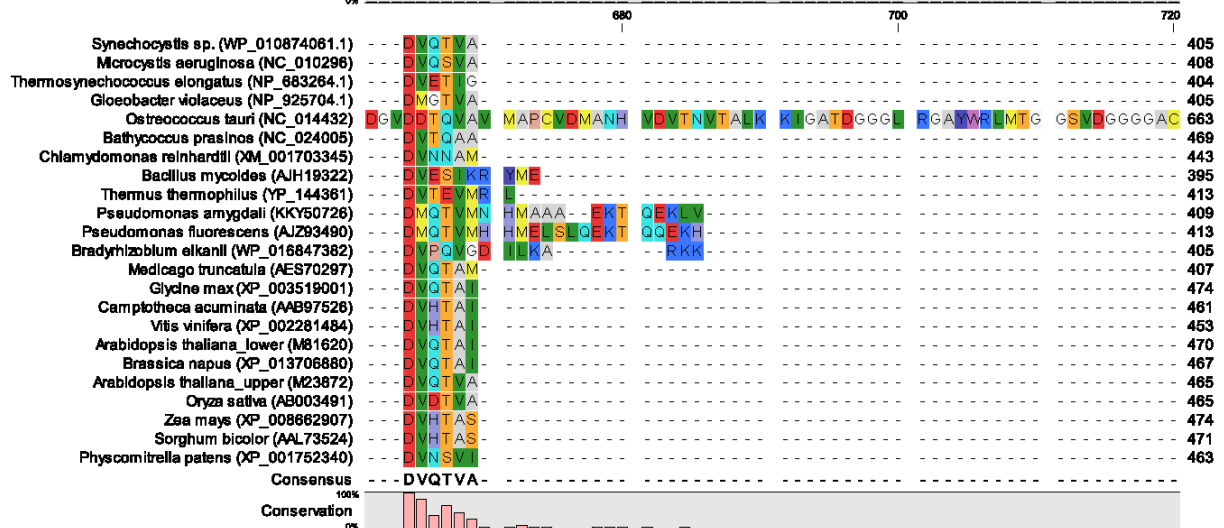



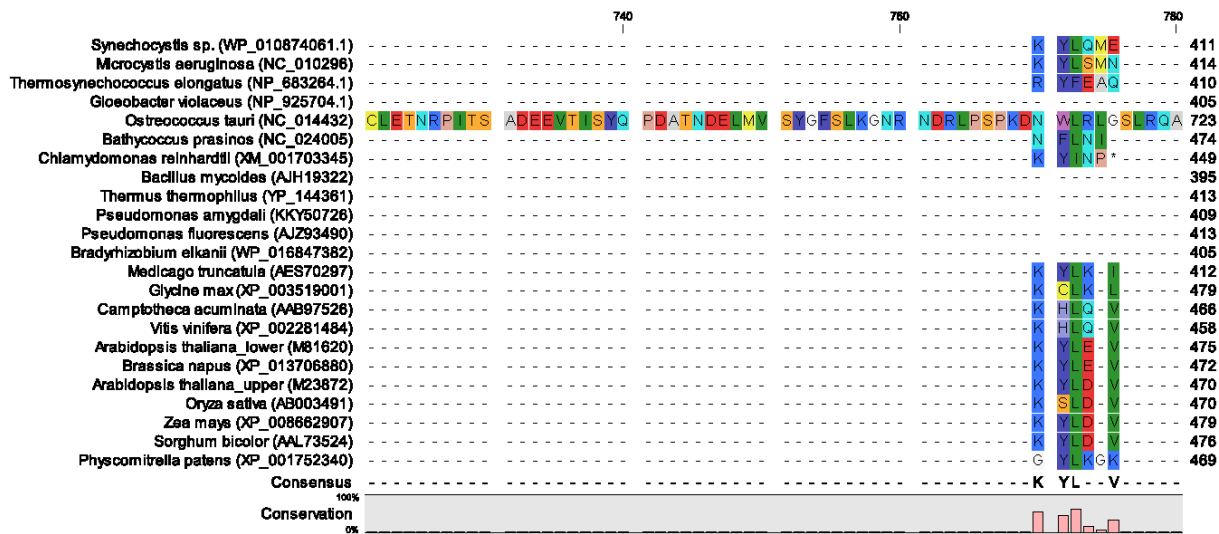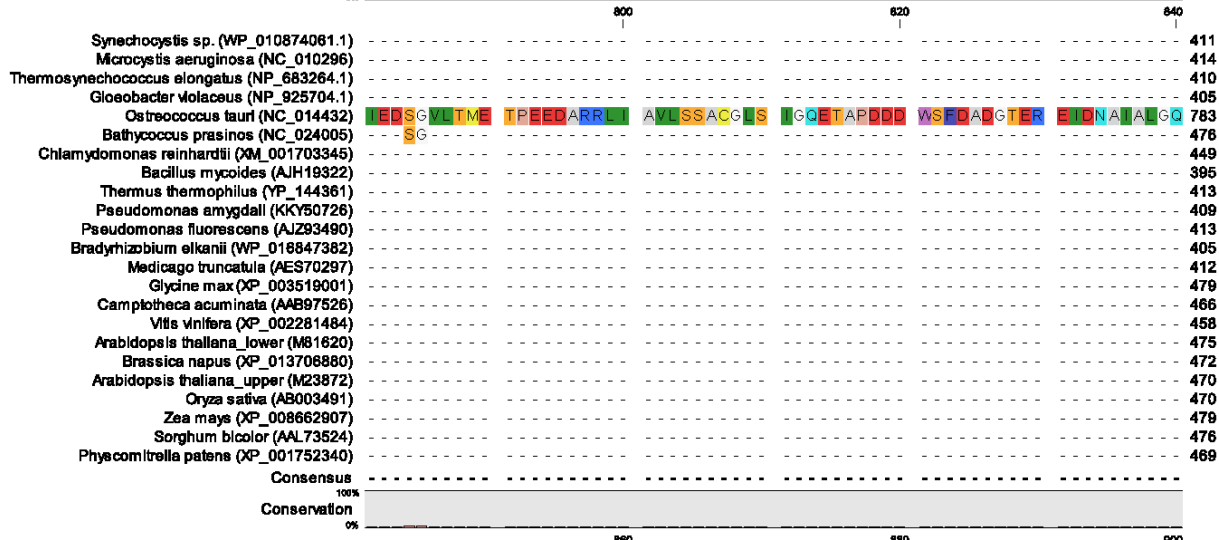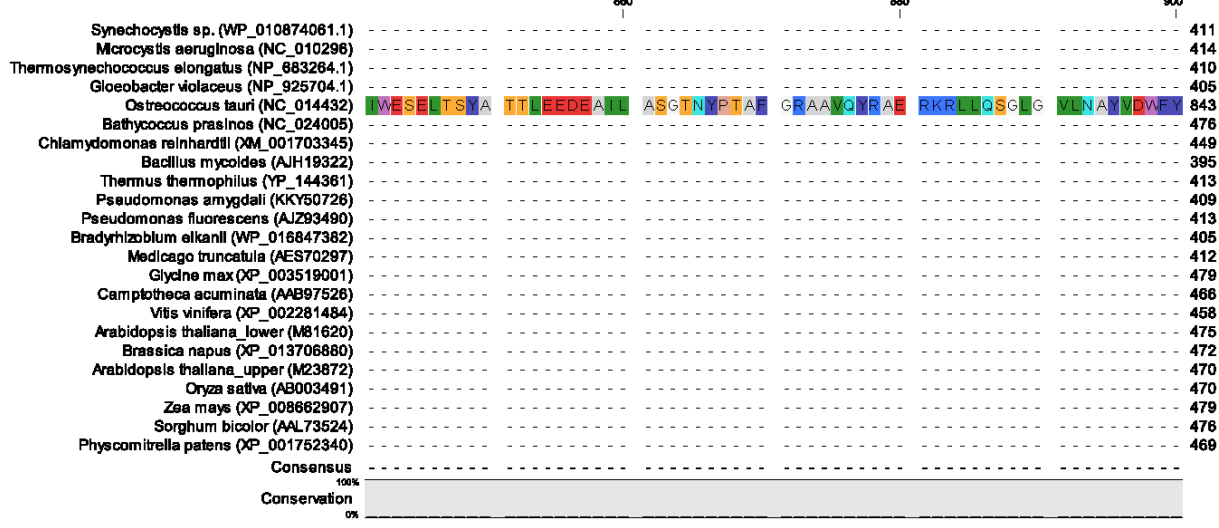

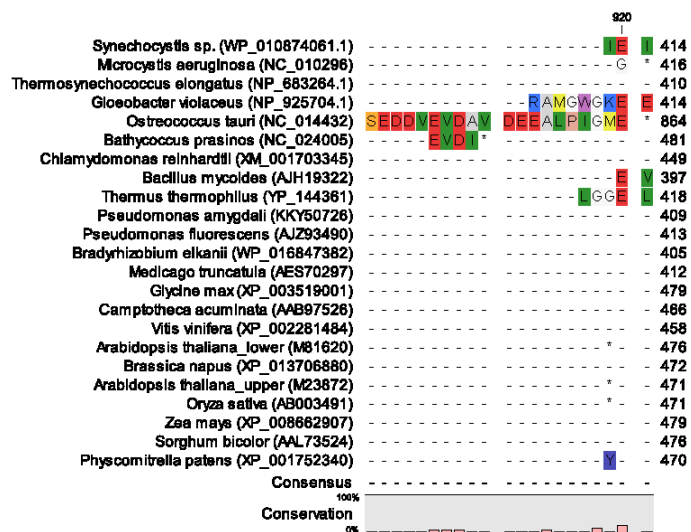

Supplementary Fig. 1. Alignment of the full-length TSB amino acid sequences from organisms representing three kingdoms.



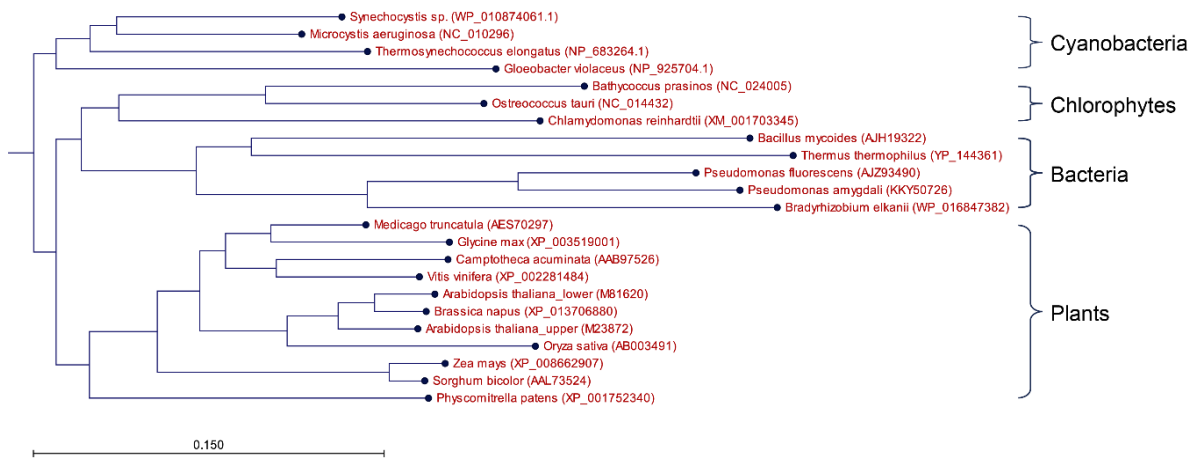

Supplementary Fig. 2. Phylogenetic tree of the TSB amino acid sequences.

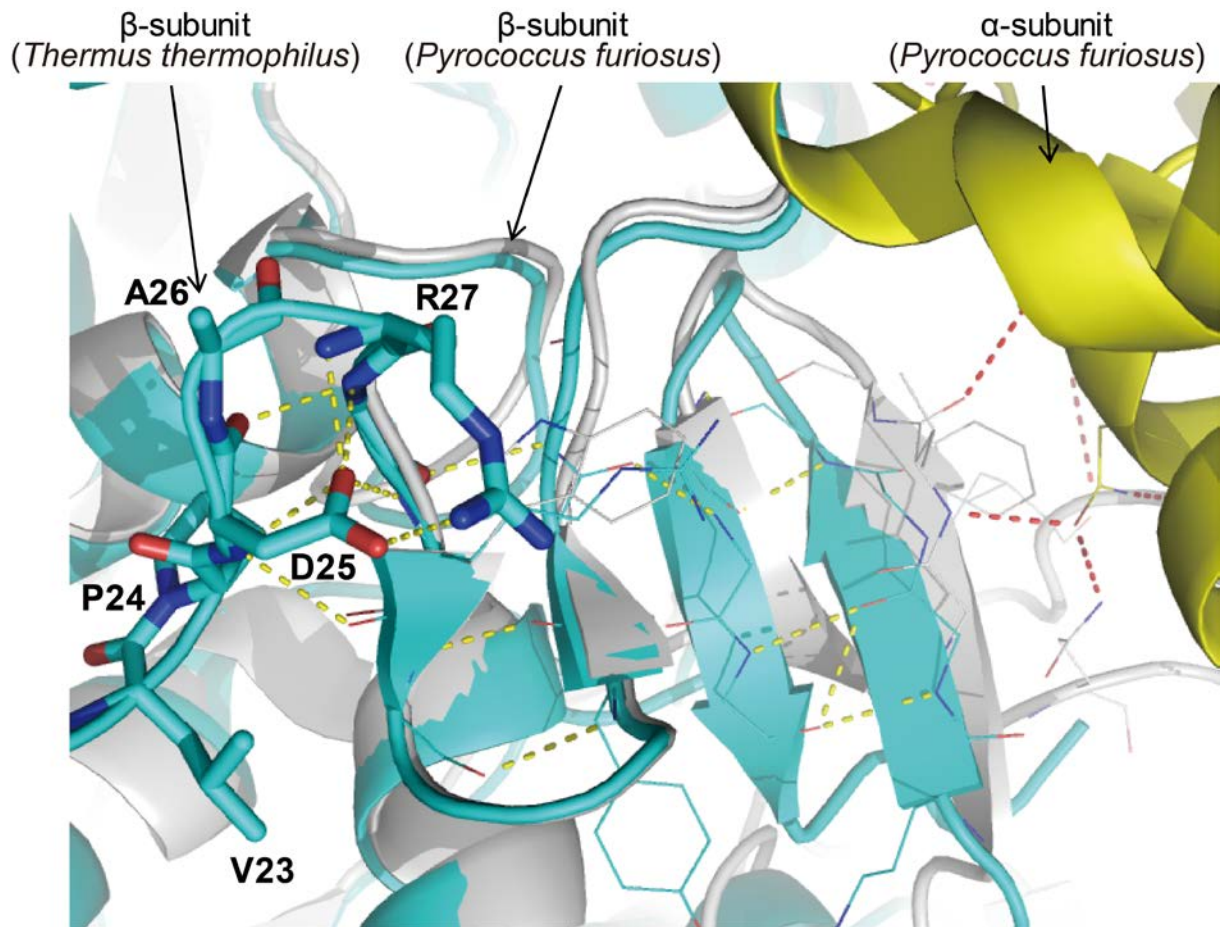

**Supplementary Fig. 3. Crystal structures of tryptophan synthases and the region corresponding to the RPDAN motif.** The  $\alpha$  and the  $\beta$  subunits of the tryptophan synthase from *Pyrococcus furiosus* (PDB CODE 1WDW) is shown as a cartoon diagram with yellow and gray colors, respectively. The  $\beta$  subunit from *Thermus thermophilus* (PDB CODE 1X1Q) is superposed with the corresponding subunit of the tryptophan synthase from *P. furiosus*, and is shown in cyan. The  $\beta$  subunit of the tryptophan synthase from *T. thermophilus* has an LPDAR (stick model) sequence at the position of the RPDAN motif of *C. reinhardtii*. The hydrogen bonds forming the  $\beta$ -sheet are shown as dotted yellow lines, and those forming the interface between the two subunits are shown as dotted red lines.

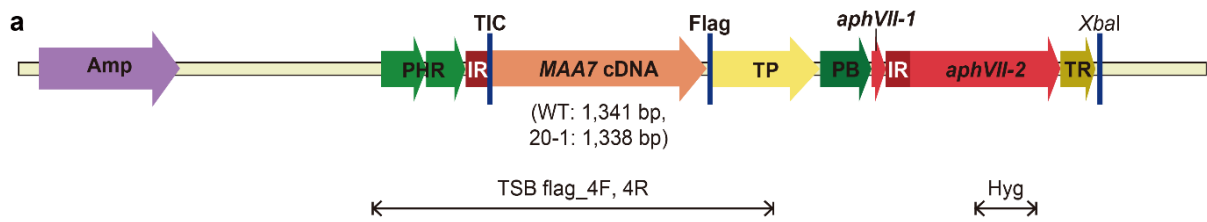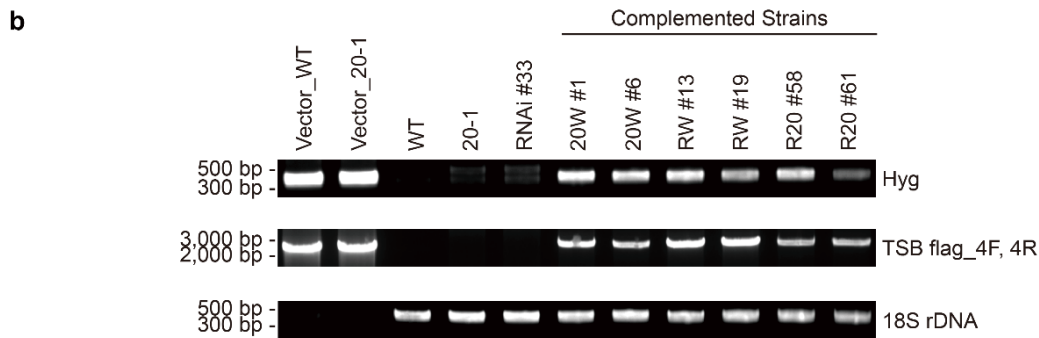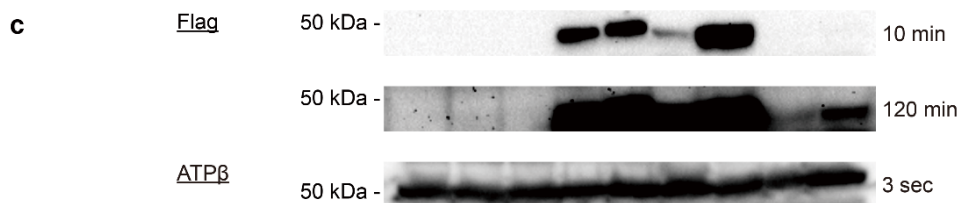

**Supplementary Fig. 4. Select complemented strains of MAA7 mutants.** (a) Schematic diagram of the vector used for complementation. Abbreviations: PHR, HSP70A-RBCS2 promoter; IR, RBCS2 intron; TIC, translation initiation context; TP, PsaD terminator; PB, beta2-tub promoter; and TR, RBCS2 terminator. (b) PCR confirmation of the integration of vector sequences into the complemented strains. The PCR amplicons for the hygromycin resistance region and 18S rDNA were 387 bp and 380 bp, respectively, while those encompassing the MAA7 cDNA and Flag tag were 2,477 bp for WT and 2,474 bp for MAA7 20-1. (c) Western blotting of FLAG-tagged MAA7 proteins from complemented strains. The expected sizes of FLAG-tagged MAA7 were 49.6 kDa for WT and 49.5 kDa for MAA7 20-1. ATPβ (the beta subunit of ATP synthase; 53.9 kDa) was used as a loading control.

**a**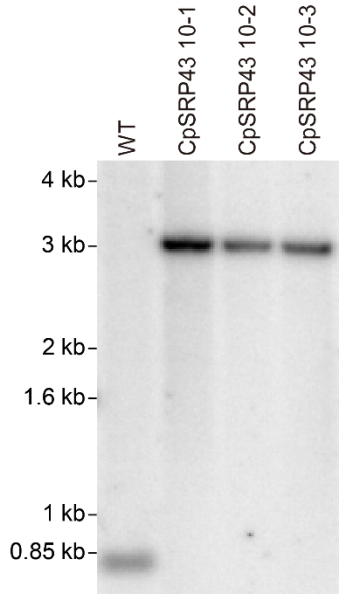**3' coding region of *CpSRP43*****b**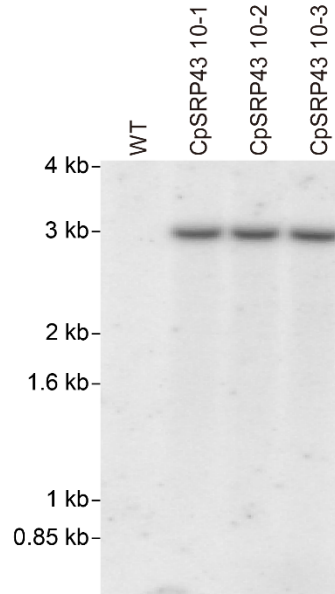***aphVII* coding region****c**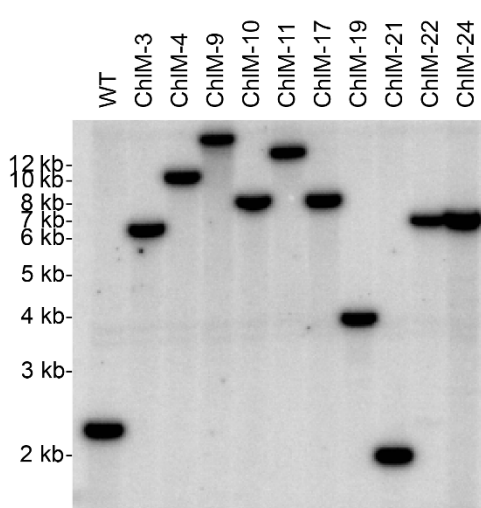**5' coding region of *ChIM*****d**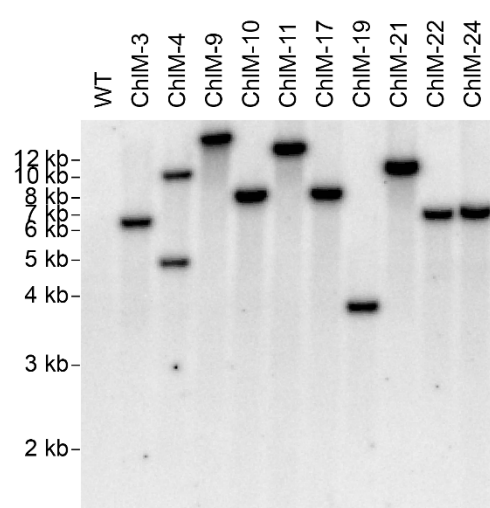***aphVII* coding region****e**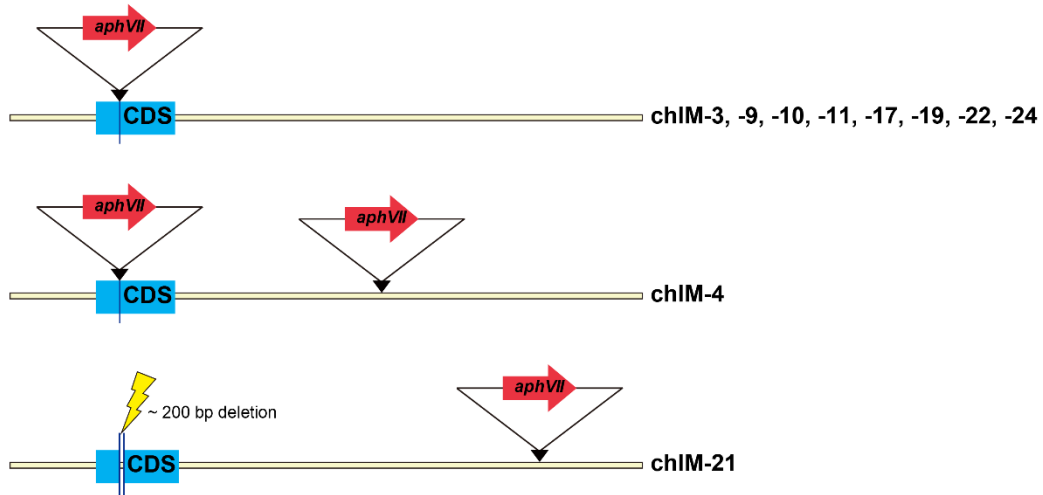

**Supplementary Fig. 5. Southern blot analyses of the CpSRP43 and ChIM mutants.** Genomic DNAs of the *CpSRP43* mutants were digested with *Pst*I and *Nco*I and subjected to Southern blotting with probes against the 3' coding region of *CpSRP43* (**a**) and the *aphVII* coding region (**b**). Genomic DNA of *ChIM* mutants was digested by *Nco*I and subjected to Southern blotting with probes against the 5' region of *ChIM* (**c**) and the *aphVII* coding region (**d**). Main classes of knock-in mutations in the *ChIM* locus were indicated in schematic drawing (**e**).

**Supplementary Table 1. The primers used in our CRISPR/Cas9 systems.**

| Gene           | Primer                    | Sequence 5'-3'                                                            | Purpose                                                                                                    | Size (bp)                                                                     |       |
|----------------|---------------------------|---------------------------------------------------------------------------|------------------------------------------------------------------------------------------------------------|-------------------------------------------------------------------------------|-------|
| <b>MAA7</b>    | M2_F                      | CAACGTTTGCCGTTGGTATG                                                      | Amplifying Cas9 cut site of <i>MAA7</i> ( <i>in vitro</i> )                                                | 783                                                                           |       |
|                | M2_R                      | TTCAGGATAGCCTCCATCTCC                                                     |                                                                                                            |                                                                               |       |
|                | I202TSB_3F                | GTCGCCGTTTCCATTGCAGGATGGCCATG<br>GAAGCTTGATAACAATGAACATCACTGCCCC<br>TACTC |                                                                                                            | Vector construction for<br>complementation of <i>MAA7</i>                     | 1,455 |
|                |                           | I202TSB_3R                                                                | TGATACAGGCGGTCCAATCTGAATTGGGCT<br>GCAGGAATTCGATTCACTTGTCGTCGTCGT<br>CCTTGTAGTCAGGGTTGATGTACTTCATGGC<br>GTT |                                                                               |       |
|                | aph 72_L                  |                                                                           | CCCCATTCCGAGGTCTTCC                                                                                        | Confirmation of complemented<br><i>MAA7</i> strains (Hygromycin<br>resistant) | 387   |
|                | aph 72_R                  | AAGGTGAAGGCGAGCAGTTC                                                      |                                                                                                            |                                                                               |       |
|                | TSB flag_4F               | GCGCAATTAACCCTCACT                                                        | Confirmation of complemented<br><i>MAA7</i> strains (transgenic <i>MAA7</i><br>gene)                       | 2,477 for WT                                                                  |       |
|                | TSB flag_4R               | CAAACCTCACATGGCCT                                                         |                                                                                                            | 2,474 for <i>MAA7</i> 20-1                                                    |       |
|                | SR6                       | GTCAGAGGTGAAATCTTGG                                                       | Confirmation of complemented<br><i>MAA7</i> strains (18S rDNA)                                             | 380                                                                           |       |
|                | SR9                       | AACTAAGAACGGCATGCAC                                                       |                                                                                                            |                                                                               |       |
| <b>CpSRP43</b> | SRP43_2F                  | TATTAGGGCATCGACAGG                                                        | Amplifying Cas9 cut site of<br><i>CpSRP43</i> ( <i>in vitro</i> )                                          | 795                                                                           |       |
|                | SRP43_2R                  | TGGAAGAATTGGAATGGG                                                        |                                                                                                            |                                                                               |       |
|                | SRP43_1F                  | CAAATACCATCGGCGTGTGG                                                      | Region A                                                                                                   | 509                                                                           |       |
|                | PRR2                      | ACTGACCCACAGCTGTCCTAAGCC                                                  |                                                                                                            |                                                                               |       |
|                | PRR2_RC                   | GGCTTAGGACAGCTGTGGGTCAGT                                                  | Region B                                                                                                   | 1,662                                                                         |       |
|                | hpt1579_R                 | TACCGCTTCAGCACTTGAGA                                                      |                                                                                                            |                                                                               |       |
|                | aph72_L                   | CCCCATTCCGAGGTCTTCC                                                       | Region C                                                                                                   | 1,089                                                                         |       |
|                | SRP43_1R                  | GCGACACCTCGTGAAGCATA                                                      |                                                                                                            |                                                                               |       |
|                | aph7_1471F                | TGGTGCAACTGCATCTCAAC                                                      | Southern blot of <i>aphVII</i> probe                                                                       | 203                                                                           |       |
|                | aph7_1114R                | CCAGAGGAAGTGCGCCAGTTCCT                                                   |                                                                                                            |                                                                               |       |
| SRP43_4F       | AAATGGAAGGTGAGAGCTGG      | Southern blot of <i>CpSRP43</i><br>probe                                  | 305                                                                                                        |                                                                               |       |
| SRP43_4R       | GTCAGATCCGTCCTGTGGAA      |                                                                           |                                                                                                            |                                                                               |       |
| <b>ChIM</b>    | CrChIM_F1                 | GTGTTGCAGAGGTGTCTCAGTTGCCAACA                                             | Amplifying Cas9 cut site of<br><i>ChIM</i> ( <i>in vitro</i> )                                             | 1,010                                                                         |       |
|                | CrChIM_R3                 | CCGTCTCGCCGTAGATCTTGCGCCA                                                 |                                                                                                            |                                                                               |       |
|                | aph7_1471F                |                                                                           | Hygromycin resistant                                                                                       | 203                                                                           |       |
|                | aph7_1114R                |                                                                           |                                                                                                            |                                                                               |       |
|                | CrChIM_F                  | TCGCTGCGTGGCGGAAGCACTA                                                    | Region D in ChIM-3, 22, 24                                                                                 | 2,000 for ChIM-3                                                              |       |
|                | aph7_1471F                |                                                                           |                                                                                                            | 1,700 for ChIM-22                                                             |       |
|                | CrChIM-F1                 |                                                                           | Region D in ChIM-9                                                                                         | 500                                                                           |       |
|                | psaD_ter_R                | GGTCTTCTCAATGGGTGTGGCACGT                                                 |                                                                                                            |                                                                               |       |
|                | CrChIM_F1                 |                                                                           | Region D in ChIM-10, 17                                                                                    | 500                                                                           |       |
|                | aph7_1471F                |                                                                           |                                                                                                            |                                                                               |       |
|                | CrChIM_F3                 | GCATGGCAAGCTGGCGTCAGCA                                                    | Region D in ChIM-19                                                                                        | 650                                                                           |       |
|                | aph7_R2                   | TTCCGGTCCGGTTCGTGCCGTCCAT                                                 |                                                                                                            |                                                                               |       |
|                | psaD_ter_R1               | CCTGTGGCTAATTGACCGTG                                                      | Region E in ChIM-3, 22, 24                                                                                 | 400 for ChIM-3                                                                |       |
|                | CrChIM_R1                 | GCACTCCTGCACCCCTTCTCACCGCT                                                |                                                                                                            | 1,000 for ChIM-22, 24                                                         |       |
|                | aph7_1471F                |                                                                           | Region E in ChIM-9, 19                                                                                     | 700 for ChIM-9                                                                |       |
|                | CrChIM_R1                 |                                                                           |                                                                                                            | 500 for ChIM-19                                                               |       |
|                | CrChIM_F1                 |                                                                           | Southern blot of <i>ChIM</i> probe                                                                         | 257                                                                           |       |
|                | CrChIM_R2                 | CCGAGGTAAAAGGCTTGGTGTGGTTAGGCA                                            |                                                                                                            |                                                                               |       |
| ChIM_RT_F      | ATGCAGTGCCTAACACCAAGCCT   | RT-PCR ( <i>ChIM</i> )                                                    | 361                                                                                                        |                                                                               |       |
| ChIM_RT_R      | CCGTCTCGCCGTAGATCTTGCGCCA |                                                                           |                                                                                                            |                                                                               |       |
| IDA5_F         | ATCGTGCGCGACATCAAGGA      | RT-PCR (loading control)                                                  | 464                                                                                                        |                                                                               |       |
| IDA5_R         | TACTCGGACTTGGCGATCCA      |                                                                           |                                                                                                            |                                                                               |       |
